# Supplementary material for: Rethinking ME/CFS Diagnostic Reference Intervals via Machine Learning, and the Utility of Activin B for Defining Symptom Severity
Source: PubMed Central journal article supplement (PMC6787626; doi:10.3390/diagnostics9030079), 2019-07-19
Supplement: diagnostics-09-00079-s001.pdf [file diagnostics-09-00079-s001.pdf]

## Appendices – “Rethinking Reference Intervals ...” (Lidbury *et al.*)

### Appendix 1 –

#### Random Forest Code and Raw Results:

##### (a) Without Activin B:

Call: randomForest(formula = as.factor(WST\_Cat.New) ~ MCH + Lymph + Urea + ALP + Creat.Excret, data = Act.CFS\_tuning, keep.forest = T, replace = T, importance = T, ntree = 5000, mtry = 4, na.action = na.omit)

Type of random forest: classification

Number of trees: 5000

No. of variables tried at each split: 4

OOB estimate of error rate: 38.14%

Confusion matrix:

| WST Class        | 0         | 1         | 2         | Class Error |
|------------------|-----------|-----------|-----------|-------------|
| 0 (Healthy/Mild) | <b>24</b> | 8         | 4         | 0.333       |
| 1 (Moderate)     | 8         | <b>24</b> | 6         | 0.368       |
| 2 (Severe)       | 3         | 8         | <b>12</b> | 0.478       |

##### (b) With Activin B included in the Model:

Call: randomForest(formula = as.factor(WST\_Cat.New) ~ MCH + Lymph + Urea + ALP + Creat.Excret + Act.B\_Base, data = Act.CFS\_tuning, keep.forest = T, replace = T, importance = T, ntree = 5000, mtry = 4, na.action = na.omit)

Type of random forest: classification

Number of trees: 5000

No. of variables tried at each split: 4

OOB estimate of error rate: 38.14%

Confusion matrix:

| WST Class | 0         | 1         | 2         | class.error |
|-----------|-----------|-----------|-----------|-------------|
| 0         | <b>23</b> | 9         | 4         | 0.361       |
| 1         | 7         | <b>24</b> | 7         | 0.368       |
| 2         | 1         | 9         | <b>13</b> | 0.435       |

**(c) Single Decision Trees – Raw results and Example Plots:**

**Results for Decision Trees (that include Activin B 1<sup>st</sup> Appointment Result):**

*("Minsplit" = 20 for all trees) – **Plots: see below (1 = ME/CFS 0 = Healthy Control)***

**CFS Y/N Model (optimised CP) -**

> prune(fit.ActB.CFS, cp = 0.14)

n= 97

| node),          | split,  | n, | loss, | yval, | (yprob)          |
|-----------------|---------|----|-------|-------|------------------|
| 1)              | root    | 97 | 17    | 1     | (0.175, 0.825)   |
| 2) Creat.Excret | >=11.85 | 26 | 10    | 1     | (0.385, 0.615)   |
| 4) Lymph        | >=2.15  | 9  | 2     | 0     | (0.778, 0.222) * |
| 5) Lymph        | < 2.15  | 17 | 3     | 1     | (0.177, 0.824) * |
| 3) Creat.Excret | < 11.85 | 71 | 7     | 1     | (0.099, 0.901) * |

(\* denotes terminal node)

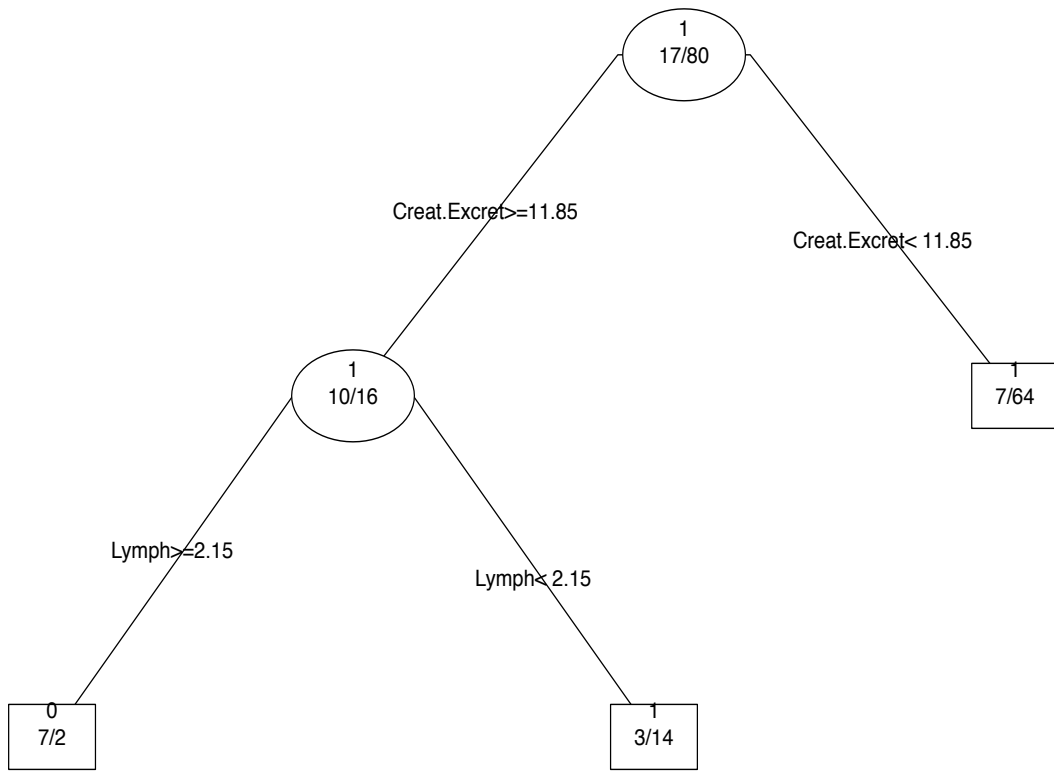

**WST (0,1,2) (Cats 0 = Healthy/Mild, 1 = Moderate, 2 = Severe) Model (optimised CP) -**

> prune (fit.ActB.CFS.WST3, cp = 0.01)

n= 97

| node),           | split,  | n, | loss, | yval, | (yprob)               |
|------------------|---------|----|-------|-------|-----------------------|
| 1)               | root    | 97 | 59    | 1     | (0.371 0.392 0.237)   |
| 2) Creat.Excret  | >=12.45 | 23 | 8     | 0     | (0.652 0.348 0.000)   |
| 4) MCH           | >=30.6  | 10 | 0     | 0     | (1.000 0.000 0.000) * |
| 5) MCH           | < 30.6  | 13 | 5     | 1     | (0.385 0.615 0.000) * |
| 3) Creat.Excret  | < 12.45 | 74 | 44    | 1     | (0.284 0.405 0.311)   |
| 6) Urea          | >=5.35  | 27 | 11    | 1     | (0.296 0.593 0.111)   |
| 12) Urea         | >=7.55  | 8  | 3     | 0     | (0.625 0.375 0.000) * |
| 13) Urea         | < 7.55  | 19 | 6     | 1     | (0.158 0.684 0.158) * |
| 7) Urea          | < 5.35  | 47 | 27    | 2     | (0.277 0.298 0.426)   |
| 14) ALP          | >=80.5  | 9  | 2     | 1     | (0.111 0.778 0.111) * |
| 15) ALP          | < 80.5  | 38 | 19    | 2     | (0.316 0.184 0.500)   |
| 30) Creat.Excret | < 8.55  | 9  | 2     | 0     | (0.778 0.111 0.111) * |
| 31) Creat.Excret | >=8.55  | 29 | 11    | 2     | (0.172 0.207 0.621) * |

(\* denotes terminal node)

### WST (0,1,2,3 – Cats 0 & 1 Separate) Model (optimised CP) -

(Cat 0 = Healthy, 1 = Mild, 2 = Moderate, 3 = Severe)

```
> prune(fit.ActB.CFS.WST4, cp = 0.08050847)
```

n= 97

| node),           | split,   | n, | loss, | yval, | (yprob)                     |
|------------------|----------|----|-------|-------|-----------------------------|
| 1)               | root     | 97 | 59    | 2     | (0.175 0.196 0.392 0.237)   |
| 2) Creat.Excret  | >=12.45  | 23 | 14    | 0     | (0.391 0.261 0.348 0.000)   |
| 4) Act.B_Base    | >=80.209 | 15 | 6     | 0     | (0.600 0.267 0.133 0.000) * |
| 5) Act.B_Base    | < 80.209 | 8  | 2     | 2     | (0.000 0.250 0.750 0.000) * |
| 3) Creat.Excret  | < 12.45  | 74 | 44    | 2     | (0.108 0.176 0.405 0.311)   |
| 6) Urea          | >=5.35   | 27 | 11    | 2     | (0.185 0.111 0.593 0.111) * |
| 7) Urea          | < 5.35   | 47 | 27    | 3     | (0.064 0.213 0.298 0.426)   |
| 14) ALP          | >=80.5   | 9  | 2     | 2     | (0.000 0.111 0.778 0.111) * |
| 15) ALP          | < 80.5   | 38 | 19    | 3     | (0.079 0.237 0.184 0.500)   |
| 30) Creat.Excret | < 8.55   | 9  | 3     | 1     | (0.111 0.667 0.111 0.111) * |
| 31) Creat.Excret | >=8.55   | 29 | 11    | 3     | (0.069 0.103 0.207 0.621) * |

(\* denotes terminal node)

**Correctly Predicted WST (0,1,2) (Cats 0,1,2) Model (optimised CP) -**

cp = 0.02857143

> prune(WST.Cats012.ActB.Path.TrPred.tree, cp = 0.02857143)

n= 58

| node),          | split,  | n, | loss, | yval, | (yprob)               |
|-----------------|---------|----|-------|-------|-----------------------|
| 1)              | root    | 58 | 35    | 0     | (0.397 0.397 0.207)   |
| 2) Creat.Excret | >=11.96 | 24 | 4     | 0     | (0.833 0.167 0.000) * |
| 3) Creat.Excret | < 11.96 | 34 | 15    | 1     | (0.089 0.559 0.353)   |
| 6) ALP          | >=62.5  | 22 | 3     | 1     | (0.000 0.864 0.136) * |
| 7) ALP          | < 62.5  | 12 | 3     | 2     | (0.250 0.000 0.750) * |

(\* denotes terminal node)

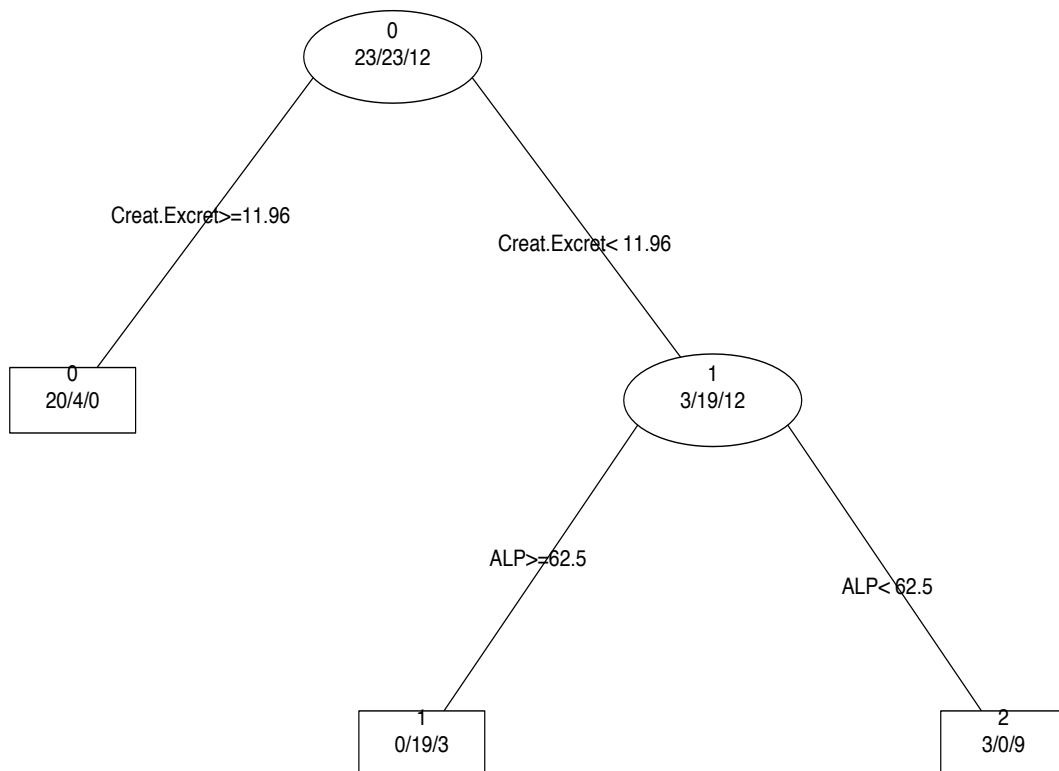

**(d) R Code to support Receiver Operating Characteristic (ROC) curve and Area Under Curve (AUC) analyses:**

*ROC for WST (0,1,2) Categories 0 versus 1 (Healthy/Minor versus Moderate Symptoms)*

```
> library (ROCR)
> Act.CFS_tuning_Cats.0.1.rf <- randomForest (as.factor(WST_Cat.New) ~ MCH + Lymph +
Urea + ALP + Creat.Excret + Act.B_Base, data = Act.CFS_tuning_Cats.0.1, keep.forest = T,
replace = T, method = "class", ntree = 5000, mtry = 4)
```

OOB estimate of error rate: 29.73%

Confusion matrix:

|   | 0  | 1  | class.error |
|---|----|----|-------------|
| 0 | 25 | 11 | 0.3055556   |
| 1 | 11 | 27 | 0.2894737   |

```
> auc_ROCR <- performance (Act.CFS_tuning_Cats.0.1.rf.pred, measure = "auc")
> auc_ROCR <- auc_ROCR@y.values[[1]]
> print(auc_ROCR)
[1] 0.755117
```
